# Supplementary material for: Cytoplasmic proteotoxicity regulates HRI-dependent phosphorylation of eIF2α via the Hsp70-Bag3 module
Source: PubMed Central journal article supplement — iScience. 2022 Apr 22;25(5):104282. doi: 10.1016/j.isci.2022.104282 (PMC9097715; doi:10.1016/j.isci.2022.104282), 2022-04-22
Supplement: mmc1.pdf [file mmc1.pdf]

**iScience, Volume 25**

**Supplemental information**

**Cytoplasmic proteotoxicity regulates  
HRI-dependent phosphorylation of eIF2 $\alpha$  via  
the Hsp70-Bag3 module**

**Shivani Patel, Santosh Kumar, Simone Baldan, Arkadi Hesin, Julia Yaglom, and Michael Y. Sherman**

## Supporting Information

### Supplement Tables:

**Table S1.** Pathways up- and downregulated by JG-98 in untransformed and transformed MCF10A cells. FDR values are shown for each pathway. Related to Figure 1.

| <b>Pathways upregulated</b>        | <b>Untransformed<br/>FDR-q.value</b> | <b>Transformed<br/>FDR-q.value</b> |
|------------------------------------|--------------------------------------|------------------------------------|
| HALLMARK_TNFA_SIGNALING_VIA_NFKB   | 0.005                                | 0.00                               |
| HALLMARK_IL6_JAK_STAT3_SIGNALING   | 0.023                                | 0.095                              |
| HALLMARK_UNFOLDED_PROTEIN_RESPONSE | 0.035                                | 0.006                              |
| HALLMARK_INFLAMMATORY_RESPONSE     | 0.143                                | 0.062                              |
| HALLMARK_P53_PATHWAY               | 0.396                                | 0.077                              |
| HALLMARK_APOPTOSIS                 | 0.349                                | 0.097                              |
| HALLMARK_HEME_METABOLISM           | 0.378                                | 0.143                              |
| HALLMARK_PEROXISOME                | 0.617                                | -                                  |
| HALLMARK_HEDGEHOG_SIGNALING        | 0.578                                | 0.322                              |
| HALLMARK_KRAS_SIGNALING_DN         | 0.546                                | 0.778                              |
| HALLMARK_KRAS_SIGNALING_UP         | 0.735                                | 0.069                              |
| HALLMARK_TGF_BETA_SIGNALING        | 0.999                                | 0.658                              |
| <b>Pathways Downregulated</b>      | <b>Untransformed<br/>FDR-q.value</b> | <b>Transformed<br/>FDR-q.value</b> |
| HALLMARK_E2F_TARGETS               | 0.127                                | 0.001                              |
| HALLMARK_G2M_CHECKPOINT            | 0.150                                | 0.015                              |
| HALLMARK_MYC_TARGETS_V2            | 0.157                                | 0.010                              |

|                             |       |       |
|-----------------------------|-------|-------|
| HALLMARK_MYC_TARGETS_V1     | 1.000 | 0.133 |
| HALLMARK_TGF_BETA_SIGNALING | 1.000 | -     |

**Table S2.** Expression of genes belonging to different branches of the UPR following JG-98 treatment. Related to Figure 2.

| Ensembl_ID      | Gene_Symbols | MCF10A/Her2 |           | MCF10A/Control |           | UPR branch    |
|-----------------|--------------|-------------|-----------|----------------|-----------|---------------|
|                 |              | Log2FC      | adj.P.Val | Log2FC         | adj.P.Val |               |
| ENSG00000044574 | HSPA5        | -0.0136     | 0.94133   | -0.123         | 0.49058   | IRE-1         |
| ENSG00000178607 | ERN1         | 0.82187     | 0.01346   | 0.4213         | 0.44783   | IRE-1         |
| ENSG00000100219 | XBP1         | 0.55164     | 0.00148   | 0.32788        | 0.12712   | IRE-1         |
| ENSG00000118217 | ATF6         | 0.16852     | 0.13802   | 0.08711        | 0.64384   | ATF6          |
| ENSG00000128965 | CHAC1        | 4.02307     | 5.31E-05  | 2.71482        | 0.02402   | eIF2 $\alpha$ |
| ENSG00000175197 | DDIT3        | 2.57308     | 8.31E-06  | 1.3092         | 0.03572   | eIF2 $\alpha$ |
| ENSG00000128272 | ATF4         | 1.33301     | 9.97E-07  | 0.53568        | 0.01286   | eIF2 $\alpha$ |

**Table S3.** List of siRNA sequences. Related to STAR methods section (Constructs and Oligonucleotides)

| List                   | Sequence (5'-3')      | Ref#                                   |
|------------------------|-----------------------|----------------------------------------|
| Bag3                   | GCAAAGAGGUGGAUUCUAA   | D-011957-01-0005                       |
| CHOP-1                 | AAGAACCAGCAGAGGUCACUU | CTM-595156, Oligo ID:<br>ALEIA-000013  |
| Human HRI              | CUGAUUAAGGGUGCAACUAUU | CTM-595153, Oligo ID:<br>ALEIA-000007  |
| Human HRI-2            | Commercial siRNA      | Horizon discovery J-<br>005007-05-0002 |
| Human GCN2             | CACCGUCAAGAUUACGGACUU | CTM-595154, Oligo ID:<br>ALEIA-000009  |
| Control<br>(Scrambled) | AGGUAGUGUAAUCGCCUUU   | CTM-595155, Oligo ID:<br>ALEIA-595155  |

**Table S4.** List of qPCR primers. Related to STAR methods section (Real Time PCR analysis).

| List           | Sequence (5'-3')        | Ref#      |
|----------------|-------------------------|-----------|
| M-Her2_fw      | AACTGCAGTCAGTTCCTCCG    | 223747403 |
| M-Her2_rev     | GTGCTTGCCCCTCACATACT    | 223747404 |
| huHRI_For      | ACCCCGAATATGACGAATCTGA  | 226359069 |
| huHRI_Rev      | CAAGTGCTCCAGCAAAGAAAC   | 226359070 |
| DDIT3_F        | GAACGGCTCAAGCAGGAAATC   | 226024031 |
| DDIT3_R        | TTCACCATTTCGGTCAATCAGAG | 226024032 |
| HuGCN2-F       | TGGTAAACATCGGGCAAATC    | 226265602 |
| HuGCN2-R       | GGACCCACTCATAACAAGA     | 226265603 |
| HuPERK1        | ACGATGAGACAGAGTTGCGAC   | 226265600 |
| HuPERK1-R      | AATCCCACTGCTTTTTACCATGA | 226265601 |
| HuPKR-F        | GCCGCTAAACTTGCATATCTTCA | 229864192 |
| HuPKR-R        | TCACACGTAGTAGCAAAGAACC  | 229864193 |
| ACTB Human     | CACCATTGGCAATGAGCGGTTC  | 225252514 |
| ACTB Human-Rev | AGGTCTTTGCGGATGTCCACGT  | 225252513 |

**Supplement Figures:**

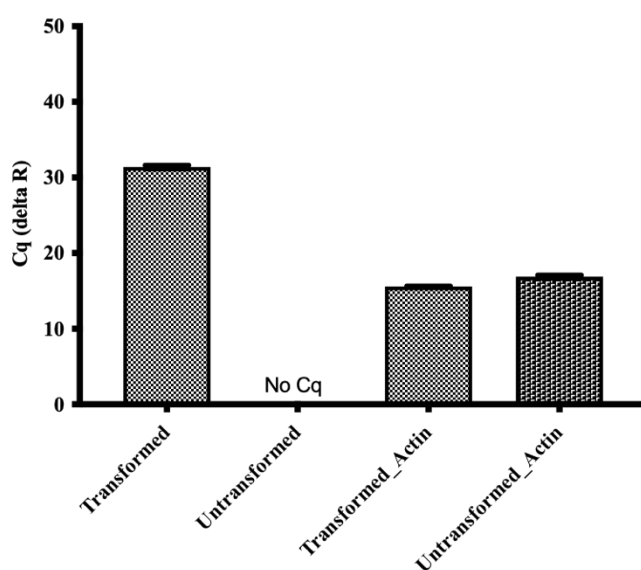

**Figure S1. Expression levels of Her2 upon cell transformation.** Related to Figure 1, qPCR was performed with Her2 primers. Graph represents the number of cycles on y-axis demonstrating the amplification of Her2.  $\beta$ -Actin was used as internal controls. Bar graph represents means  $\pm$ SEM of triplicate experiments.

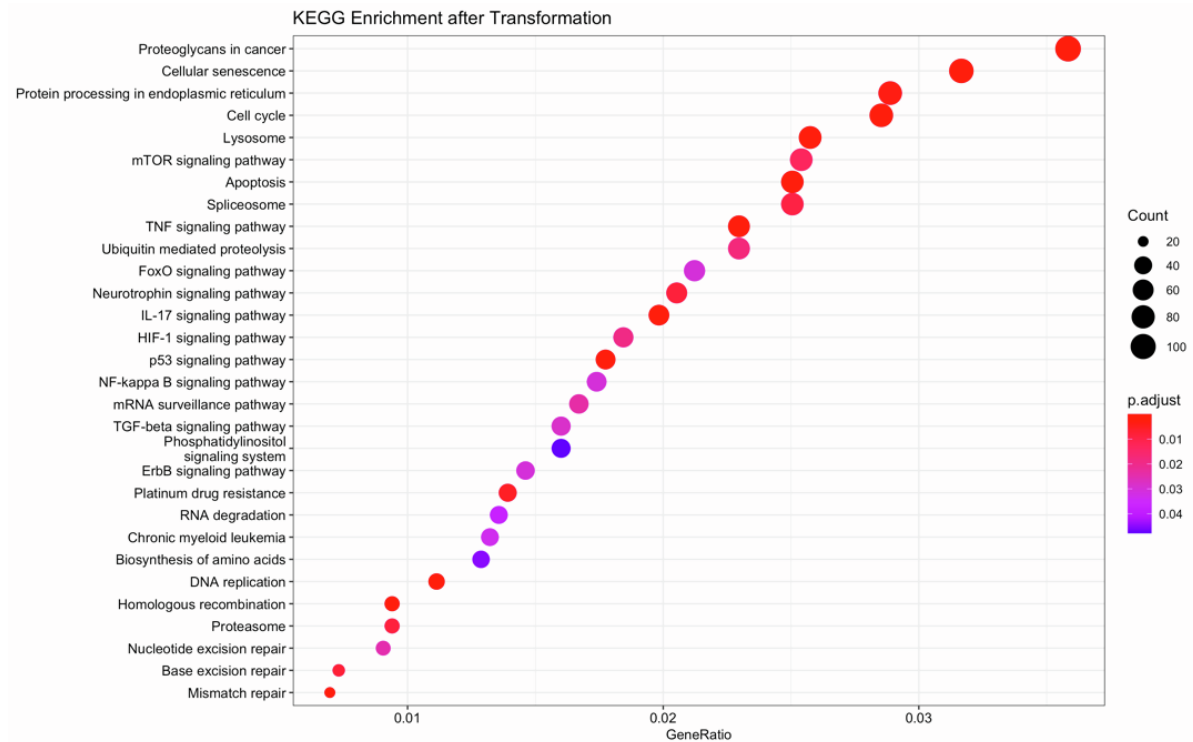

**Figure S2. Enrichment of oncogenic signatures in transformed cells.** Related to Figure 1, Transformed cells state was assessed by analysing differential expression of genes in transformed and untransformed cells. Enrichment of pathways (KEGG-Kyoto Encyclopedia of Genes and Genomes) such as m-TOR, HIF-1, TGF-beta, Phosphatidylinositol (PI3K), ErbB (Her2) shows the oncogenic signature in transformed cells. Count represents genes in the respective pathways.

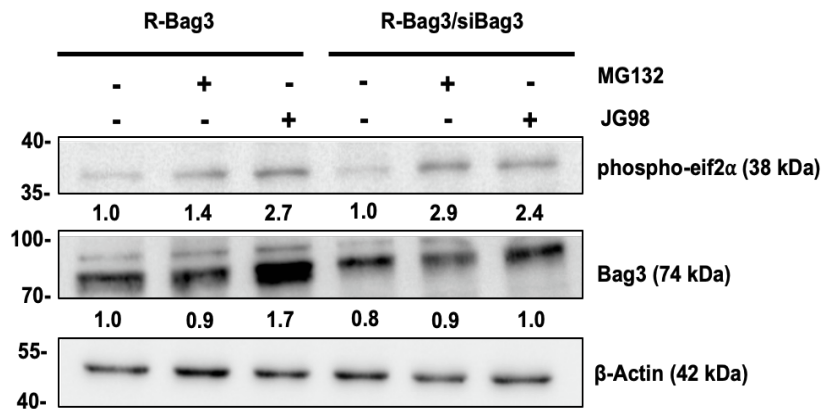

**Figure S3.** Expression of siRNA-resistant Bag3 reverses effects of the siRNA on suppression of phosphorylation of eIF2 $\alpha$  in response to JG-98 and MG132. Related to Figure 2, MCF-10A cells expressing Bag3 resistant to siBag3 were transfected with siBag3 or siControl and further treated with JG98. Quantification of the blot was performed using ImageJ and OD ratios for each protein compared to the reference after normalization is added below each blot.

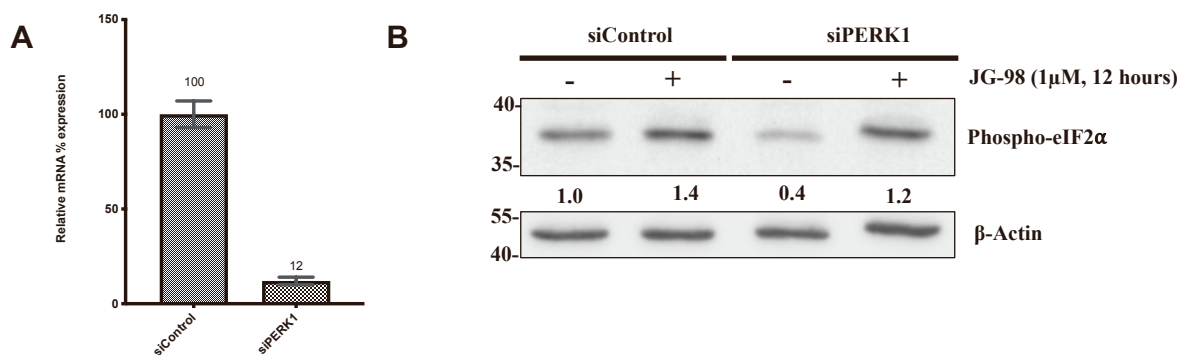

**Figure S4.** Depletion of PERK1 does not suppress phosphorylation of eIF2 $\alpha$  in response to JG-98. Related to Figure 2. **(A)** Efficiency of PERK1 depletion following siRNA treatment. Levels of PERK1 mRNA were quantified by qPCR. Bar graph represents means  $\pm$ SEM of triplicate experiments. **(B)** Depletion of PERK1 did not suppress phosphorylation of eIF2 $\alpha$  in presence of JG-98. Cells were transfected with siPERK1 or siControl and further treated by JG-98 (1 $\mu$ M, 12 hours) or left untreated. Levels of phospho-eIF2 $\alpha$  were determined in cell

lysates by immunoblotting with the corresponding antibody. Quantification of the blot was performed using ImageJ and OD ratios for each protein compared to the reference after normalization is added below each blot.

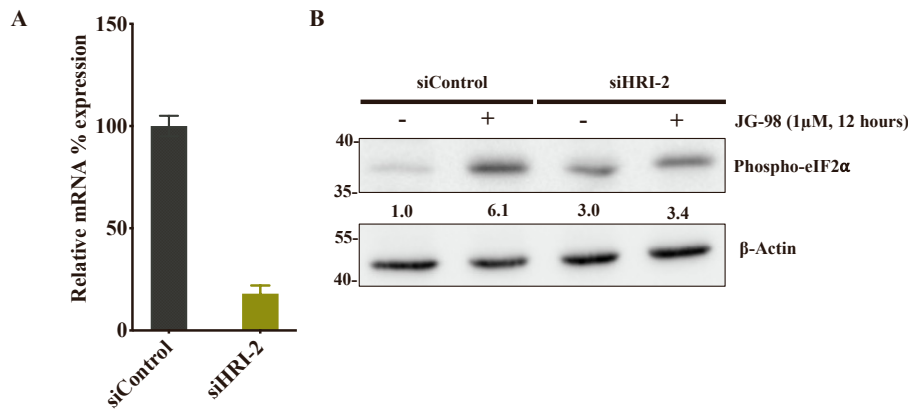

**Figure S5. Depletion of HRI with a distinct siRNA (siHRI-2) also suppresses phosphorylation of eIF2α in response to JG-98.** Related to Figure 2, (A) Depletion of HRI measured by qPCR. Bar graph represents means  $\pm$ SEM of triplicate experiments. (B) Effect of siHRI-2 on p-eIF2α. Quantification of the blot was performed using ImageJ and OD ratios for each protein compared to the reference after normalization is added below each blot.

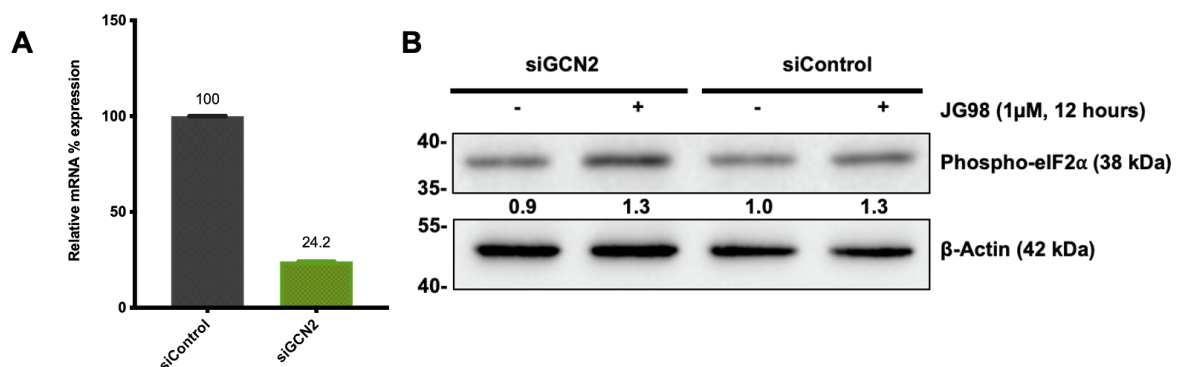

**Figure S6. Depletion of GCN2 does not suppress phosphorylation of eIF2α in response to JG-98.** Related to Figure 2, (A) GCN2 depletion was done by the corresponding siRNA for 48 hours, followed by qPCR. Bar graph represents means  $\pm$ SEM of triplicate experiments. (B) Depletion of GCN2 shows no impact on eIF2α phosphorylation in presence of JG-98.





**Figure S8. Bag3 silencing reduces the level of HRI.** Related to Figure 3, **(A)** Cells were treated with siBag3 or left untreated. Ubiquitinated proteins were pulled down from these cells extracts using ubiquilin-1 affinity column (see Materials and Methods) and HRI levels in the pulldown were measured by immunoblotting. Depletion of Bag3 reduces the level of HRI with polyubiquitinated proteins, **(B)** Silencing levels of the Bag3 in pull down experiment. Quantification of the blot was performed using ImageJ and OD ratios for each protein compared to the reference after normalization is added below each blot.
